# Supplementary material for: A proposed update for the classification and description of bacterial lipolytic enzymes
Source: PeerJ. 2019 Jul 8;7:e7249. doi: 10.7717/peerj.7249 (PMC6622161; doi:10.7717/peerj.7249)
Supplement: Table S1 — Both enzymes and the similarity scores of interest are in bold when high ( >60%) similarity was identified. [file peerj-07-7249-s001.xlsx]

## Sheet: Pairwise_similarities_NovelVsKn
Supplementary Table 1: Similarity of reported novel lipolytic proteins against the accepted type proteins for each lipolytic family. Both enzymes and the similarity scores of interest are in bold when high (>60%) similarity was identified.
	Family_1.1_D50587	Family_1.2_X70354	Family_1.3_D11455	Family_1.4_M74010	Family_1.5_U78785	Family_1.6_M12715	Family_1.7_X99255	Family_1.8_Q3IF07	Family_2_P10480	Family_3_M86351	Family_4_X62835	Family_5_M58445	Family_6_D90904	Family_7_Q01470	Family_8_AAA99492
EstOF4	33.7165	39.4636	40.613	27.2031	39.0805	38.3142	39.0805	36.7816	37.931	32.1839	42.5287	32.567	29.8851	39.4636	36.3985
LipS	31.4286	37.5	35.3571	29.6429	35.7143	34.6429	34.6429	34.6429	32.5	36.4286	37.8571	31.0714	25.7143	38.5714	34.2857
bMGL	38.4	41.2	38.8	33.6	38.8	41.2	36	42.4	35.6	30	41.6	36.8	29.2	35.6	35.6
HZ_lipase	32.8125	30.4688	35.1562	20.8333	69.5312	57.0312	28.9062	33.8542	30.2083	24.2188	38.5417	26.3021	21.3542	34.6354	35.9375
Est9x	34.0136	32.9932	37.415	28.5714	34.0136	35.7143	39.7959	39.4558	35.3741	31.9728	45.2381	31.6327	29.5918	41.4966	37.7551
Rv0045c	33.557	37.2483	36.9128	26.1745	35.906	39.9329	36.9128	40.604	32.5503	29.8658	42.6174	34.2282	27.5168	41.6107	38.9262
EstGX1	35.2381	37.619	37.619	30.4762	37.619	37.619	37.1429	38.0952	40	40	41.4286	38.0952	30.4762	40.4762	40.4762
MPlaG	21.0619	25.4867	29.0265	16.8142	30.4425	37.1681	24.9558	28.6726	21.2389	23.5398	38.9381	18.7611	13.2743	28.8496	26.5487
RlipE1	31.3019	27.7008	31.5789	24.0997	34.903	33.241	29.9169	34.349	33.518	26.3158	34.349	25.7618	26.5928	39.8892	30.4709
EstP2K	38.8393	41.9643	42.8571	31.6964	40.1786	41.0714	37.9464	33.0357	32.5893	29.9107	41.9643	40.1786	28.125	39.2857	37.5
Cbes-AcXE2	34.1121	34.5794	38.3178	28.0374	38.3178	40.1869	37.8505	39.7196	40.1869	32.7103	36.4486	32.243	31.7757	39.7196	42.9907
Est12	30.6991	32.8267	33.4347	28.2675	34.3465	37.0821	30.3951	34.0426	32.8267	31.9149	41.6413	32.5228	25.8359	39.2097	31.6109
estI	22.2615	22.7915	25.265	16.9611	35.8657	62.5442	20.8481	26.1484	20.8481	17.4912	37.6325	19.258	12.7208	25.6184	20.6714
FnL	33.7748	40.3974	31.7881	29.4702	38.0795	44.3709	33.7748	35.7616	30.1325	31.1258	40.0662	30.1325	22.5166	38.7417	39.0728
LipA-like	42.9603	46.5704	36.8231	29.9639	47.2924	40.7942	37.9061	40.0722	33.574	30.3249	35.3791	35.3791	24.5487	31.769	38.2671
LipR	23.7687	28.9079	26.7666	18.6296	31.0493	32.5482	25.0535	29.5503	22.4839	22.9122	43.0407	24.6253	19.2719	32.334	30.4069
PlaB	24.0506	26.5823	29.1139	17.2996	30.8017	30.5907	26.5823	27.6371	24.4726	21.308	34.8101	21.308	17.7215	33.9662	27.6371
LipJ2	26.9504	32.8605	33.0969	21.513	29.3144	33.3333	28.1324	32.1513	34.279	26.2411	39.0071	22.695	19.3853	35.2246	30.9693
EstGtA2	39.759	40.9639	38.9558	28.5141	42.9719	35.3414	37.751	43.3735	33.3333	29.7189	41.3655	35.3414	28.1124	36.9478	37.3494
EstA	33.213	36.4621	36.1011	25.6318	33.213	39.7112	34.296	36.8231	34.296	35.3791	38.2671	29.2419	25.9928	35.0181	44.0433
Est30	33.6032	36.8421	40.4858	24.6964	40.081	38.8664	34.8178	40.081	36.4372	30.3644	41.7004	29.1498	29.9595	42.915	38.8664
phaZ7	29.2105	29.4737	31.3158	23.4211	32.6316	37.1053	31.0526	28.9474	25.5263	30	40	25.5263	19.2105	38.9474	29.4737
FLS18D	29.3919	32.4324	37.8378	28.7162	37.5	34.7973	32.7703	35.473	34.1216	38.1757	41.2162	31.4189	29.0541	38.5135	33.7838
FLS18C	33.9768	41.3127	35.1351	29.7297	36.2934	45.5598	36.6795	41.6988	35.5212	37.4517	40.5405	35.5212	31.6602	37.8378	40.9266
EM3L4	33.6364	40.9091	36.0606	25.4545	33.9394	36.9697	35.4545	36.0606	32.1212	30.6061	39.697	25.4545	27.5758	40.9091	34.5455
LipEH166	26.2467	29.3963	33.5958	24.147	34.3832	36.4829	31.2336	31.4961	25.9843	24.4094	41.9948	23.622	20.9974	37.0079	30.9711
LipG	32.3333	34.3333	36.3333	25	38	38.6667	30.3333	33	32	28.6667	43.6667	27.3333	26.6667	38	35.6667
EstD2	29.9748	32.4937	34.2569	21.4106	31.9899	36.5239	26.9521	32.9975	25.1889	27.204	37.0277	24.6851	17.8841	34.005	32.7456
EstD	27.4272	31.3107	30.0971	20.3883	29.8544	35.1942	29.8544	33.9806	26.9417	28.1553	41.0194	24.0291	20.1456	32.767	31.5534
GS11	26.4259	28.8973	27.1863	19.0114	29.0875	32.8897	24.9049	30.9886	23.0038	21.2928	38.9734	20.3422	15.3992	34.2205	28.7072
Est22	24.477	26.569	27.1967	21.1297	29.0795	31.7992	23.431	26.9874	24.8954	28.2427	39.5397	22.1757	16.5272	31.1715	26.1506
EstGH	26.5625	31.25	30.1339	21.6518	32.5893	34.5982	28.3482	31.0268	29.6875	25.8929	39.7321	26.3393	20.3125	30.3571	28.125
EstGS	27.9597	32.7456	33.7531	22.4181	33.7531	36.5239	30.7305	34.2569	31.2343	31.2343	43.8287	25.4408	21.6625	33.7531	34.005
LipSm	31.5	34	31.25	23	35.5	39.75	31.5	30.5	27	28.5	44.75	25.5	23.5	36	33
EstA3	27.2947	27.7778	29.7101	21.4976	27.5362	34.2995	27.0531	32.3671	27.7778	27.7778	36.2319	22.4638	20.7729	35.9903	30.1932
EstUT1	35.0806	39.5161	39.9194	29.8387	39.5161	39.5161	33.0645	40.7258	38.3065	31.8548	39.5161	35.0806	31.8548	39.9194	37.0968
EstDZ2	39.4834	35.7934	44.2804	29.1513	40.2214	37.2694	35.4244	35.4244	35.0554	35.7934	39.1144	32.8413	29.1513	47.6015	37.6384
