# Supplementary material for: A proposed update for the classification and description of bacterial lipolytic enzymes
Source: PeerJ. 2019 Jul 8;7:e7249. doi: 10.7717/peerj.7249 (PMC6622161; doi:10.7717/peerj.7249)
Supplement: Table S2 — Both enzymes and the similarity scores of interest are in bold when high ( >60%) similarity was identified. [file peerj-07-7249-s002.xlsx]

## Sheet: Pairwise_similarities
Supplementary Table 2: Pairwise comparison of similarity between novel lipolytic proteins. Both enzymes and the similarity scores of interest are in bold when high (>60%) similarity was identified.
	EstOF4	LipS	bMGL	Est9x	Rv0045c	EstGX1	MPlaG	RlipE1	EstP2K	Cbes-AcXE2	Est12	FnL	LipA-like	LipR	PlaB	LipJ2	EstGtA2	EstA	Est30	phaZ7	FLS18D	FLS18C	EM3L4	LipEH166	LipG	EstD2	EstD	GS11	Est22	EstGH	EstGS	LipSm	EstA3	EstUT1	EstDZ2
EstOF4	NA	43.295	44.8276	34.4828	35.6322	31.0345	36.7816	31.8008	33.3333	31.4176	32.9502	31.8008	36.0153	37.931	36.7816	37.931	45.2107	28.7356	78.1609	33.7165	31.4176	31.4176	36.0153	36.7816	26.4368	36.3985	36.3985	42.5287	34.0996	33.7165	33.7165	39.0805	33.7165	57.8544	31.4176
LipS	40.3571	NA	58.5714	33.9286	34.6429	27.5	39.2857	33.2143	23.5714	26.0714	33.9286	30.7143	27.5	35	32.8571	37.5	58.5714	33.5714	38.9286	31.7857	32.8571	31.7857	37.1429	35.3571	28.9286	34.2857	37.5	42.5	36.7857	39.6429	38.5714	43.5714	37.5	38.2143	28.2143
bMGL	46.8	65.6	NA	31.6	36.4	28.8	37.2	33.2	27.2	31.6	34.4	35.6	32.4	36.8	40.8	38.4	91.6	26	44.8	37.2	36	33.6	37.6	34	33.6	34.4	38.8	42.4	32.4	42.8	37.2	40.8	39.6	42.8	32.4
Est9x	30.6122	32.3129	26.8707	NA	36.3946	25.5102	36.7347	32.3129	25.1701	24.4898	38.4354	31.6327	27.551	38.0952	37.415	37.7551	26.8707	29.2517	28.9116	36.3946	32.3129	30.9524	35.7143	34.0136	31.9728	40.1361	38.7755	37.7551	36.3946	37.415	32.6531	40.1361	35.034	29.2517	35.034
Rv0045c	31.2081	32.5503	30.5369	35.906	NA	28.8591	37.9195	32.5503	23.4899	27.1812	34.5638	31.8792	32.8859	40.9396	38.255	38.9262	29.8658	31.5436	33.557	38.9262	29.8658	31.2081	32.5503	34.8993	28.8591	33.557	39.2617	41.6107	40.604	36.5772	39.9329	38.5906	41.2752	34.5638	33.557
EstGX1	38.5714	36.6667	34.2857	35.7143	40.9524	NA	42.381	39.5238	30.4762	34.7619	41.4286	36.1905	36.6667	37.619	42.8571	41.4286	34.7619	35.2381	34.7619	41.4286	38.5714	35.7143	36.6667	37.619	35.2381	39.5238	38.5714	40	37.619	34.2857	39.5238	44.2857	37.619	31.4286	34.7619
MPlaG	16.9912	19.469	16.6372	19.115	20	15.7522	NA	24.4248	16.2832	14.1593	22.1239	23.3628	20.354	30.2655	28.6726	27.2566	15.2212	18.0531	18.0531	25.8407	20.885	17.8761	22.1239	24.7788	21.9469	24.2478	28.1416	34.1593	31.5044	28.3186	27.9646	26.9027	27.4336	18.2301	18.4071
RlipE1	22.9917	25.7618	22.9917	26.3158	25.7618	22.9917	38.2271	NA	18.0055	24.9307	31.856	26.5928	25.4848	31.856	35.4571	33.241	22.1607	27.1468	21.3296	32.687	28.2548	29.3629	34.626	33.241	26.5928	31.0249	30.1939	36.2881	35.1801	37.6731	34.349	34.349	30.4709	20.4986	25.2078
EstP2K	38.8393	29.4643	30.3571	33.0357	31.25	28.5714	41.9643	29.0179	NA	25.4464	33.4821	39.7321	40.1786	34.375	35.7143	34.375	29.9107	30.8036	31.25	33.4821	36.6071	31.25	37.5	34.375	35.7143	40.1786	40.625	39.2857	35.7143	37.5	36.1607	38.3929	41.9643	32.5893	36.1607
Cbes-AcXE2	38.3178	34.1121	36.9159	34.1121	37.8505	34.1121	37.3832	42.0561	26.6355	NA	34.5794	39.2523	35.0467	39.2523	43.9252	37.3832	35.0467	33.6449	36.9159	37.8505	34.5794	28.5047	33.1776	38.785	34.5794	34.1121	43.9252	38.785	39.2523	35.514	42.0561	40.6542	40.1869	34.5794	39.2523
Est12	26.1398	29.1793	26.1398	33.4347	31.307	26.4438	37.9939	34.9544	22.7964	22.4924	NA	28.8754	27.3556	37.9939	35.8663	36.1702	27.9635	30.6991	24.3161	34.0426	35.8663	31.6109	29.7872	32.2188	31.9149	34.9544	37.0821	34.3465	39.2097	39.5137	35.5623	37.386	34.3465	26.7477	39.8176
FnL	27.4834	28.4768	29.4702	30.7947	31.457	25.1656	43.7086	31.7881	29.4702	27.8146	31.457	NA	34.4371	39.7351	35.4305	35.7616	25.8278	28.1457	26.8212	34.4371	32.7815	30.7947	36.0927	34.106	27.4834	37.4172	34.7682	40.3974	36.4238	36.755	36.0927	34.4371	32.7815	28.8079	29.4702
LipA-like	33.935	27.7978	29.2419	29.2419	35.3791	27.7978	41.5162	33.213	32.491	27.0758	32.491	37.5451	NA	33.574	35.7401	34.657	28.1588	30.3249	30.6859	33.213	34.296	33.574	34.296	33.213	34.657	37.9061	33.935	37.1841	35.0181	38.6282	33.213	35.7401	36.8231	31.4079	29.6029
LipR	20.985	20.985	19.7002	23.9829	26.1242	16.9165	36.6167	24.6253	16.4882	17.9872	26.7666	25.6959	19.9143	NA	31.4775	40.8994	22.0557	24.197	19.4861	28.2655	25.2677	22.4839	29.7645	25.6959	26.9807	29.7645	26.7666	34.4754	32.9764	32.9764	30.8351	35.546	27.8373	22.0557	26.3383
PlaB	20.2532	19.4093	21.519	23.2068	23.2068	18.9873	34.1772	27.0042	16.8776	19.8312	24.8945	22.5738	20.8861	31.0127	NA	27.4262	21.73	21.9409	19.8312	26.5823	22.3629	21.73	22.9958	24.8945	23.2068	24.4726	28.692	32.9114	32.4895	31.2236	28.481	29.5359	28.27	18.1435	21.9409
LipJ2	23.4043	24.8227	22.695	26.2411	27.4232	20.5674	36.643	28.3688	17.9669	18.9125	28.1324	25.5319	22.695	45.1537	30.7329	NA	22.4586	23.8771	22.2222	31.2057	26.0047	23.8771	31.9149	29.7872	27.1868	32.8605	27.896	36.4066	31.6785	34.5154	34.279	43.9716	30.0236	23.1678	26.2411
EstGtA2	47.3896	65.8635	91.9679	31.7269	35.743	29.3173	34.5382	32.1285	26.9076	30.1205	36.9478	31.3253	31.3253	41.3655	41.3655	38.1526	NA	34.5382	46.1847	36.1446	34.5382	34.1365	35.743	40.1606	34.5382	36.5462	38.9558	43.7751	36.5462	40.1606	37.751	38.9558	36.9478	42.1687	29.7189
EstA	27.0758	33.935	23.4657	31.0469	33.935	26.7148	36.8231	35.3791	24.9097	25.9928	36.4621	30.6859	30.3249	40.7942	37.5451	36.4621	31.0469	NA	28.5199	35.3791	33.213	36.1011	35.0181	36.1011	30.6859	36.1011	39.3502	40.0722	42.2383	38.2671	38.2671	39.7112	35.7401	27.7978	35.7401
Est30	82.5911	44.1296	45.3441	34.413	40.4858	29.5547	41.2955	31.1741	28.3401	31.9838	32.3887	32.7935	34.413	36.8421	38.0567	38.4615	46.5587	31.9838	NA	34.8178	31.9838	30.7692	34.8178	32.7935	30.3644	31.5789	42.5101	41.2955	38.4615	34.8178	40.8907	38.8664	37.6518	65.1822	34.8178
phaZ7	22.6316	23.4211	24.2105	28.1579	30.5263	22.8947	38.4211	31.0526	19.7368	20.5263	29.4737	27.3684	24.2105	34.4737	32.8947	34.7368	23.6842	25.7895	22.8947	NA	25.2632	23.9474	27.6316	29.2105	25	33.1579	28.9474	38.1579	34.2105	31.8421	30.5263	31.3158	34.2105	21.8421	23.1579
FLS18D	27.7027	31.0811	30.4054	32.0946	30.0676	27.3649	39.8649	34.4595	27.7027	25	39.8649	33.4459	32.0946	39.8649	35.8108	37.1622	29.0541	31.0811	26.6892	32.4324	NA	55.0676	36.1486	36.1486	30.0676	35.8108	34.7973	35.1351	38.8514	35.473	34.7973	38.1757	34.4595	27.027	35.8108
FLS18C	31.6602	34.3629	32.4324	35.1351	35.9073	28.9575	38.9961	40.9266	27.027	23.5521	40.1544	35.9073	35.9073	40.5405	39.7683	40.5405	32.8185	38.61	29.3436	35.1351	62.9344	NA	41.6988	39.7683	35.9073	37.4517	40.9266	40.1544	37.4517	37.8378	40.5405	38.9961	38.61	33.9768	37.0656
EM3L4	28.4848	31.5152	28.4848	31.8182	29.3939	23.3333	36.9697	37.8788	25.4545	21.5152	29.697	33.0303	28.7879	41.2121	33.0303	40.9091	27.2727	29.3939	26.0606	31.8182	32.4242	32.7273	NA	37.2727	28.7879	35.7576	33.0303	40.9091	34.8485	34.2424	40.6061	41.2121	30.9091	29.0909	34.5455
LipEH166	25.1969	25.9843	22.3097	26.2467	27.2966	20.9974	36.7454	31.4961	20.21	21.7848	27.8215	27.0341	24.147	31.4961	30.9711	33.0709	26.2467	26.2467	21.2598	29.1339	28.084	27.0341	32.2835	NA	29.3963	29.9213	32.021	37.7953	32.021	29.3963	30.4462	30.9711	29.6588	23.8845	28.8714
LipG	23	27	28	31.3333	28.6667	24.6667	41.3333	32	26.6667	24.6667	35	27.6667	33	42	36.3333	38.3333	28.6667	28.3333	25	31.6667	29.6667	31	31	37.3333	NA	38.6667	40	36.6667	35	38	35.6667	38	32	30.6667	31.6667
EstD2	23.9295	24.1814	21.6625	29.7229	25.1889	20.9068	34.5088	28.2116	22.67	18.3879	28.9673	28.4635	26.4484	35.0126	29.2191	35.0126	22.9219	25.1889	19.6474	31.738	26.7003	24.4332	29.7229	28.7154	29.2191	NA	32.7456	40.0504	34.2569	36.272	32.9975	30.4786	30.7305	24.4332	28.7154
EstD	23.0583	25.4854	23.5437	27.6699	27.9126	19.6602	38.5922	26.4563	22.0874	22.8155	29.6117	27.1845	22.8155	30.0971	33.0097	28.6408	23.5437	26.4563	25.4854	26.699	25	25.7282	26.4563	29.6117	29.1262	31.5534	NA	34.466	36.6505	34.2233	29.1262	30.8252	33.9806	24.2718	26.9417
GS11	20.3422	22.6236	20.1521	21.1027	23.5741	15.9696	36.692	24.9049	16.73	15.7795	21.4829	23.0038	20.1521	30.6084	29.6578	29.2776	20.7224	21.1027	19.3916	27.5665	19.7719	19.7719	25.6654	27.3764	20.9125	30.2281	26.9962	NA	30.7985	34.7909	28.7072	29.0875	29.0875	19.5817	19.2015
Est22	18.6192	22.3849	16.9456	22.5941	25.3138	16.5272	37.2385	26.569	16.7364	17.5732	26.9874	23.0126	20.2929	32.2176	32.2176	28.0335	19.0377	24.477	19.8745	27.1967	24.0586	20.0837	24.8954	25.523	21.9665	28.4519	31.59	33.8912	NA	30.5439	29.0795	28.8703	29.0795	20.2929	20.5021
EstGH	19.6429	24.7768	23.8839	24.5536	24.3304	16.0714	35.7143	30.1339	18.75	16.9643	29.0179	24.7768	23.8839	34.375	33.0357	32.5893	22.7679	23.6607	19.1964	27.0089	23.4375	21.875	25.2232	25	25.4464	32.1429	31.4732	40.8482	32.5893	NA	33.2589	28.3482	28.5714	19.8661	25.4464
EstGS	22.1662	27.204	23.4257	24.1814	29.9748	20.9068	39.7985	31.2343	20.1511	22.67	29.471	27.4559	23.1738	36.272	34.005	36.5239	23.6776	26.7003	25.4408	29.2191	25.9446	26.4484	33.7531	29.2191	26.9521	32.9975	30.2267	38.0353	35.0126	37.5315	NA	37.0277	31.2343	19.8992	29.471
LipSm	25.5	30.5	25.5	29.5	28.75	23.25	38	31	21.5	21.75	30.75	26	26	41.5	35	46.5	23.75	27.5	24	29.75	28.25	25.25	34	29.5	28.5	30.25	31.75	38.25	34.5	31.75	36.75	NA	32	24	28.25
EstA3	21.256	25.3623	23.913	24.8792	29.7101	19.0821	37.4396	26.57	22.7053	20.7729	28.5024	23.913	25.1208	31.401	32.3671	30.6763	22.2222	23.913	22.4638	31.401	24.6377	24.1546	24.6377	27.2947	23.1884	29.4686	33.8164	37.1981	33.5749	30.9179	29.9517	30.9179	NA	27.0531	23.1884
EstUT1	60.8871	43.1452	43.1452	34.6774	41.5323	26.6129	41.129	29.8387	29.4355	29.8387	33.4677	35.0806	35.0806	41.9355	34.6774	39.5161	42.3387	31.0484	64.9194	33.4677	31.0484	35.4839	38.7097	36.6935	37.0968	39.1129	39.5161	41.5323	39.1129	35.8871	31.8548	38.7097	45.1613	NA	27.4194
EstDZ2	30.2583	29.1513	29.8893	38.0074	36.9004	26.9373	38.3764	33.5793	29.8893	30.9963	48.3395	32.8413	30.2583	45.3875	38.3764	40.9594	27.3063	36.5314	31.7343	32.4723	38.3764	35.4244	42.0664	40.5904	35.0554	42.0664	40.9594	37.2694	36.1624	42.0664	43.1734	41.6974	35.4244	25.0923	NA
