# Supplementary material for: A proposed update for the classification and description of bacterial lipolytic enzymes
Source: PeerJ. 2019 Jul 8;7:e7249. doi: 10.7717/peerj.7249 (PMC6622161; doi:10.7717/peerj.7249)
Supplement: Table S3 — For each protein its publication date and isolation source were reported. Genome annotation was conducted at two levels of strictness and taxonomy of matches reported at both the family and genus level. Taxonomy was assigned using both the NCBI taxonomic assignments and the GTDB method. [file peerj-07-7249-s003.xlsx]

## Sheet: NCBI taxonomic search summary
Supplementary Table 3: Annotation of each studied lipolytic protein against the genome database. For each protein its publication date and isolation source were reported. Genome annotation was conducted at two levels of strictness and taxonomy of matches reported at both the family and genus level. Taxonomy was assigned using both the NCBI taxonomic assignments and the GTDB method.
Lipase family	Publication year	Origin	80% ID over 80% query and subject coverage		60% ID over 80% query and subject coverage
			Families	Genera	Families	Genera
Family 1.1	1999	isolate	pseudomonadaceae	pseudomonas	pseudomonadaceae, oceanospirillaceae, erysipelotrichaceae, vibrionaceae	vibrio, catenibacterium, bermanella, pseudomonas
Family 1.2	1999	isolate	burkholderiaceae	burkholderia	pseudomonadaceae, burkholderiaceae	burkholderia, pseudomonas, paraburkholderia, pandoraea, caballeronia
Family 1.3	1999	isolate	pseudomonadaceae	pseudomonas	pseudomonadaceae	pseudomonas
Family 1.4	1999	isolate	bacillaceae	bacillus	bacillaceae	bacillus
Family 1.5	1999	isolate	bacillaceae	anoxybacillus, geobacillus	bacillaceae	geobacillus, anoxybacillus
Family 1.6	2002	isolate	staphylococcaceae	staphylococcus	staphylococcaceae	staphylococcus
Family 1.7	2002	isolate	propionibacteriaceae	Cutibacterium, propionibacterium	propionibacteriaceae	cutibacterium, propionibacterium
Family 1.8	2010	isolate	pseudoalteromonadaceae	pseudoalteromonas	pseudoalteromonadaceae	pseudoalteromonas
Family 2	1999	isolate	aeromonadaceae	aeromonas	aeromonadaceae	aeromonas
Family 3	1999	isolate	streptomycetaceae	streptomyces	streptomycetaceae, dermabacteraceae, microbacteriaceae, actinospicaceae, nocardiopsaceae, actinobacteria, nocardiaceae, pseudonocardiaceae, nocardioidaceae, glycomycetaceae, kineosporiaceae micromonosporaceae, thermomonosporaceae, deinococcaceae, streptosporangiaceae, cellulomonadaceae, actinopolysporaceae	marinactinospora, deinococcus, micromonospora, nonomuraea, actinoplanes, dactylosporangium, saccharomonospora, thermomonospora, amycolatopsis, lentzea, actinomadura, streptosporangium, rathayibacter, actinobacteria, lechevalieria, alloactinosynnema, hamadaea, thermoactinospora, catelliglobosispora, streptomyces, glycomyces, aeromicrobium, brachybacterium, verrucosispora, asanoa, cellulomonas, kin…
Family 4	1999	isolate	alicyclobacillaceae	alicyclobacillus	alicyclobacillaceae	alicyclobacillus
Family 5	1999	isolate	pseudomonadaceae	pseudomonas	hahellaceae, pseudomonadaceae	zooshikella, pseudomonas
Family 6	1999	isolate	merismopediaceae	synechocystis	merismopediaceae	synechocystis
Family 7	1999	isolate
Family 8	1999	isolate	micrococcaceae	arthrobacter	micrococcaceae	arthrobacter, paenarthrobacter
phaZ7	2001	isolate
Est30	2004	isolate	bacillaceae	Anoxybacillus, bacillus, geobacillus, parageobacillus	brevibacteriaceae, bacillaceae, paenibacillaceae, planococcaceae, staphylococcaceae, sporolactobacillaceae	geobacillus, rummeliibacillus, jeotgalibacillus, paenisporosarcina, alteribacillus, caldibacillus, brevibacterium, lysinibacillus, paenibacillus, pontibacillus, macrococcus, anoxybacillus, parageobacillus, kurthia, domibacillus, fictibacillus, staphylococcus, bacillus, viridibacillus, salipaludibacillus, planomicrobium, tuberibacillus, anaerobacillus, bacillaceae, aeribacillus, planococcus, exigu…
EstUT1	2018	isolate	bacillaceae, planococcaceae	lysinibacillus, ureibacillus	bacillaceae, planococcaceae	solibacillus, caryophanon, lysinibacillus, ureibacillus, bacillus
EstOF4	2013	isolate	bacillaceae	bacillus	bacillaceae, planococcaceae	bhargavaea, exiguobacterium, paucisalibacillus, bacillus, virgibacillus, sporosarcina, terribacillus, planomicrobium, jeotgalibacillus, fictibacillus, paenisporosarcina, salsuginibacillus, alteribacillus, ornithinibacillus, anaerobacillus, psychrobacillus, domibacillus
LipG	2006	metagenome
EstD	2007	isolate	thermotogaceae	thermotoga	thermotogaceae	thermotoga
EstA	2008	metagenome			brucellaceae, rhizobiales, sphingomonadaceae, hapalosiphonaceae, streptomycetaceae, rhodobacteraceae, amaranthaceae, xanthobacteraceae, rhizobiaceae, aurantimonadaceae, bradyrhizobiaceae, methylobacteriaceae, rhodobiaceae, erythrobacteraceae, rhodospirillaceae, phyllobacteriaceae, hyphomicrobiaceae	ensifer, rhizobiales, aminobacter, nitratireductor, pacificibacter, ancylobacter, rubellimicrobium, niveispirillum, aquamicrobium, phyllobacteriaceae, methylobacterium, acuticoccus, labrys, mesorhizobium, aureimonas, bosea, rhizobium, ochrobactrum, porphyrobacter, phyllobacterium, sphingomonas, streptomyces, xanthobacteraceae, paramesorhizobium, shinella, stappia, pseudochrobactrum, brucella, lut…
PlaB	2009	isolate	legionellaceae	fluoribacter, legionella	legionellaceae	fluoribacter, legionella
LipEH166	2009	metagenome	alteromonadaceae	marinobacter	oceanospirillaceae, alteromonadaceae, oleiphilaceae	bermanella, oleiphilus, marinobacter
EstD2	2010	metagenome
FLS18D	2010	metagenome
FLS18C	2010	metagenome
EstGS	2011	metagenome
EstGH	2011	metagenome			mycobacteriaceae	mycobacterium
Est3L4	2011	metagenome
EstA3	2011	isolate	thermoanaerobacteraceae	caldanaerobacter	thermoanaerobacteraceae	caldanaerobacter, thermoanaerobacter
LipR	2012	isolate	nocardiaceae	rhodococcus	nocardiaceae	rhodococcus
EstGtA2	2010	isolate	bacillaceae	Geobacillus, anoxybacillus	bacillaceae, planococcaceae, paenibacillaceae	bhargavaea, bacillaceae, geobacillus, paenibacillus, oceanobacillus, halobacillus, piscibacillus, bacillus, sporosarcina, edaphobacillus, terribacillus, anoxybacillus, parageobacillus, virgibacillus, lysinibacillus, domibacillus, fictibacillus
bMGL	2000	isolate	bacillaceae	anoxybacillus, geobacillus	bacillaceae, planococcaceae	bhargavaea, geobacillus, thalassobacillus, bacillus, oceanobacillus, halobacillus, anoxybacillus, fictibacillus
LipS	2012	metagenome	symbiobacteriaceae	symbiobacterium	rhodanobacteraceae, symbiobacteriaceae	rudaea, symbiobacterium
LipSM54	2016	isolate	Xanthomonadaceae, pseudomonadaceae	stenotrophomonas, xanthomonas, pseudomonas	xanthomonadaceae, pseudomonadaceae	pseudomonas, xanthomonas, lysobacter, stenotrophomonas
EstDZ2	2016	metagenome
Est22	2017	isolate	alteromonadaceae	alteromonas	alteromonadaceae, pseudoalteromonadaceae	aestuariibacter, alteromonas, lacimicrobium, pseudoalteromonas, glaciecola, aliiglaciecola, salinimonas, paraglaciecola
LipJ2	2017	isolate	intrasporangiaceae	janibacter	intrasporangiaceae	janibacter
LipSm	2018	isolate	Xanthomonadaceae, pseudomonadaceae	stenotrophomonas, xanthomonas, pseudomonas	xanthomonadaceae, pseudomonadaceae	pseudomonas, xanthomonas, stenotrophomonas
AcXE2	2017	isolate	thermoanaerobacterales family iii. incertae sedis	caldicellulosiruptor	chthonomonadaceae, paenibacillaceae, thermoanaerobacterales family iii. incertae sedis, bacillaceae	geobacillus, paenibacillus, caldicellulosiruptor, parageobacillus, gorillibacterium, chthonomonas
Est12	2013	isolate	moraxellaceae	psychrobacter	moraxellaceae	psychrobacter
Est9x	2014	metagenome	alteromonadaceae	glaciecola	alteromonadaceae	glaciecola
EstGX1	2012	metagenome
MplaG	2012	metagenome			oceanospirillaceae	motiliproteus, oceanospirillum
RlipE1	2009	metagenome
Rv0045c	2011	isolate	mycobacteriaceae	mycobacterium	mycobacteriaceae	mycobacterium
FnL	2010	isolate	fervidobacteriaceae	fervidobacterium	fervidobacteriaceae	fervidobacterium
LipA	2010	metagenome
EstP2K	2013	metagenome

## Sheet: GTDB taxonomic search summary
Lipase family	Publication year	Origin	80% ID over 80% query and subject coverage		60% ID over 80% query and subject coverage
			Families	Genera	Families	Genera
Family 1.1	1999	isolate	Pseudomonadaceae	Pseudomonas	Erysipelatoclostridiaceae, Pseudomonadaceae, Saccharospirillaceae, Vibrionaceae	Pseudomonas_L, Vibrio, Pseudomonas_H, Pseudomonas_M, Pseudomonas_D, Pseudomonas_E, Pseudomonas_F, Pseudomonas_A, Catenibacterium, Pseudomonas, Bermanella
Family 1.2	1999	isolate	Burkholderiaceae	Burkholderia	Burkholderiaceae	Paraburkholderia, Burkholderia, Caballeronia, Paraburkholderia_B, Pandoraea, Paraburkholderia_E
Family 1.3	1999	isolate	Pseudomonadaceae	Pseudomonas_E	Pseudomonadaceae	Pseudomonas_E
Family 1.4	1999	isolate	Bacillaceae	Bacillus	Bacillaceae, Bacillaceae_H	Bacillus_I, Bacillus
Family 1.5	1999	isolate	Anoxybacillaceae	Anoxybacillus_A, Geobacillus	Anoxybacillaceae	Anoxybacillus_A, Geobacillus
Family 1.6	2002	isolate	Staphylococcaceae	Staphylococcus	Staphylococcaceae	Staphylococcus
Family 1.7	2002	isolate	Propionibacteriaceae	Cutibacterium	Propionibacteriaceae	Cutibacterium
Family 1.8	2010	isolate	Alteromonadaceae	Pseudoalteromonas	Alteromonadaceae	Pseudoalteromonas
Family 2	1999	isolate	Aeromonadaceae	Aeromonas	Aeromonadaceae	Aeromonas
Family 3	1999	isolate	Streptomycetaceae	Streptomyces	Cellulomonadaceae, Deinococcaceae, Dermabacteraceae, Kineococcaceae, Microbacteriaceae, Micromonosporaceae, Nocardioidaceae, Pseudonocardiaceae, Streptomycetaceae, Streptosporangiaceae	Amycolatopsis, Thermomonospora_A, Actinomadura, Deinococcus_B, Aeromicrobium, Rathayibacter, Lentzea, Lechevalieria_C, Lechevalieria, Alloactinosynnema, Asanoa, Hamadaea, Thermoactinospora, Catelliglobosispora, Streptomyces, Glycomyces, Nonomuraea, Saccharomonospora_A, Brachybacterium, Saccharothrix, Lechevalieria_A, Cellulomonas, Kineococcus, Saccharopolyspora, Nocardiopsis_B, Yuhushiella, Nocar…
Family 4	1999	isolate	Alicyclobacillaceae	Alicyclobacillus	Alicyclobacillaceae	Alicyclobacillus_B, Alicyclobacillus, USBA-503
Family 5	1999	isolate	Pseudomonadaceae	Pseudomonas, Pseudomonas_C, Pseudomonas_D, Pseudomonas_E, Pseudomonas_F, Pseudomonas_G, Pseudomonas_H, Pseudomonas_L, Pseudomonas_M	Pseudomonadaceae, Zooshikellaceae	Pseudomonas_L, Pseudomonas_M, Pseudomonas_H, Pseudomonas_D, Pseudomonas_E, Pseudomonas_F, Pseudomonas_G, Pseudomonas_C, Zooshikella, Pseudomonas
Family 6	1999	isolate	Microcystaceae	Synechocystis	Microcystaceae	Synechocystis
Family 7	1999	isolate
Family 8	1999	isolate	Micrococcaceae	MA-N2	Micrococcaceae	Paenarthrobacter, ATCC21022, MA-N2, Arthrobacter_G
phaZ7	2001	isolate
Est30	2004	isolate	Anoxybacillaceae	Anoxybacillus, Anoxybacillus_A, Geobacillus, Parageobacillus, Parageobacillus_A	Aeribacillaceae, Anaerobacillaceae, Anaerobacillaceae_A, Anoxybacillaceae, Bacillaceae, Bacillaceae_A, Bacillaceae_B, Bacillaceae_C, Bacillaceae_D, Bacillaceae_F, Bacillaceae_G, Bacillaceae_H, Bacillaceae_I, Bacillaceae_J, Bacillaceae_K, Bacillaceae_L, Caldibacillaceae, Domibacillaceae, Exiguobacteraceae, Fictibacillaceae, Halobacillaceae, Jeotgalibacillaceae, Marinococcaceae, Massilibacteriaceae…	45385, Aeribacillus, Alteribacillus_A, Anaerobacillus, Anaerobacillus_A, Anoxybacillus, Anoxybacillus_A, Bacillus, Bacillus_A, Bacillus_AA, Bacillus_AB, Bacillus_AC, Bacillus_AD, Bacillus_AE, Bacillus_AF, Bacillus_AG, Bacillus_AH, Bacillus_AI, Bacillus_AJ, Bacillus_AK, Bacillus_AL, Bacillus_AM, Bacillus_AO, Bacillus_AQ, Bacillus_AR, Bacillus_AS, Bacillus_AU, Bacillus_AV, Bacillus_AW, Bacillus_AX,…
EstUT1	2018	isolate	Planococcaceae	Lysinibacillus_A, Ureibacillus	Planococcaceae	Bacillus_BI, Bacillus_R, Caryophanon, Lysinibacillus_A, Lysinibacillus_B, Lysinibacillus_C, Solibacillus, Ureibacillus
EstOF4	2013	isolate	Bacillaceae_D	Bacillus_S	Amphibacillaceae, Anaerobacillaceae, Anaerobacillaceae_A, Bacillaceae, Bacillaceae_A, Bacillaceae_B, Bacillaceae_D, Bacillaceae_F, Bacillaceae_I, Caldibacillaceae, Domibacillaceae, Exiguobacteraceae, Fictibacillaceae, Jeotgalibacillaceae, Marinococcaceae, Massilibacteriaceae, NC2-31, Planococcaceae, Salisediminibacteriaceae	NC2-31, Jeotgalibacillus, Bacillus_BG, Fictibacillus, Planococcus_A, Ornithinibacillus, Planococcus_B, Domibacillus, Bacillus_BH, Bhargavaea, Bacillus, Planomicrobium_A, Exiguobacterium_A, Ornithinibacillus_A, Planomicrobium, Salsuginibacillus, Anaerobacillus, SIT6, FJAT-27916, Virgibacillus_B, Exiguobacterium, Paenisporosarcina, Sporosarcina_C, Fictibacillus_C, Bacillus_AY, Sporosarcina, 45385, …
LipG	2006	metagenome
EstD	2007	isolate	Thermotogaceae	Thermotoga	Thermotogaceae	Thermotoga
EstA	2008	metagenome			Amorphaceae, Azospirillaceae, Beijerinckiaceae, Devosiaceae, Labraceae, Lutibaculaceae, Nostocaceae, Puniceispirillaceae, Rhizobiaceae, Rhodobacteraceae, Sphingomonadaceae, Xanthobacteraceae	Acuticoccus, Agrobacterium, Aliihoeflea, Allorhizobium, Aminobacter, Ancylobacter, Aquamicrobium, Aquamicrobium_A, Aureimonas, Azorhizobium, B7, Bosea, Brucella, Ensifer, Fischerella, Hoeflea, Labrys, Lutibaculum, Maritalea, Martelella, Mesorhizobium, Mesorhizobium_A, Methylobacterium, Neorhizobium, Nitratireductor, Nitrospirillum, Niveispirillum, Notoacmeibacter, Ochrobactrum, Ochrobactrum_A, Pa…
PlaB	2009	isolate	Legionellaceae	Legionella, Legionella_C, Legionella_D, Tatlockia	Legionellaceae	Legionella_C, Legionella_D, Tatlockia, Legionella
LipEH166	2009	metagenome	Hahellaceae	Marinobacter	Hahellaceae, Saccharospirillaceae	Bermanella, Marinobacter
EstD2	2010	metagenome
FLS18D	2010	metagenome
FLS18C	2010	metagenome
EstGS	2011	metagenome
EstGH	2011	metagenome			Corynebacteriaceae	Mycobacterium
Est3L4	2011	metagenome
EstA3	2011	isolate	Thermoanaerobacteraceae	Caldanaerobacter	Thermoanaerobacteraceae	Caldanaerobacter, Thermoanaerobacter
LipR	2012	isolate	Corynebacteriaceae	Rhodococcus	Corynebacteriaceae	Rhodococcus
EstGtA2	2010	isolate	Anoxybacillaceae	Anoxybacillus, Anoxybacillus_A, Geobacillus	Alkalibacillaceae, Amphibacillaceae, Anoxybacillaceae, Bacillaceae, Bacillaceae_A, Bacillaceae_C, Bacillaceae_H, Domibacillaceae, Fictibacillaceae, Halobacillaceae, Planococcaceae	Anoxybacillus, Anoxybacillus_A, Bacillus_AA, Bacillus_AB, Bacillus_AE, Bacillus_AG, Bacillus_AY, Bacillus_C, Bacillus_P, Bacillus_U, Bacillus_W, Bacillus_Y, Bhargavaea, Domibacillus, Fictibacillus_B, Fictibacillus_C, Geobacillus, Halobacillus, Lysinibacillus, MUM-13, Oceanobacillus, Parageobacillus, Parageobacillus_A, Piscibacillus, Quasibacillus, Terribacillus, URHB0009
bMGL	2000	isolate	Anoxybacillaceae	Anoxybacillus, Anoxybacillus_A, Geobacillus	Amphibacillaceae, Anoxybacillaceae, Bacillaceae, Fictibacillaceae, Halobacillaceae, NC2-31, Planococcaceae	Bhargavaea, Anoxybacillus_A, Geobacillus, NC2-31, Thalassobacillus, Oceanobacillus, Halobacillus, Bacillus_P, Anoxybacillus, Fictibacillus_C
LipS	2012	metagenome	Symbiobacteriaceae	Symbiobacterium	Rhodanobacteraceae, Symbiobacteriaceae	Rudaea, Symbiobacterium
LimSM54	2016	isolate	Xanthomonadaceae	Stenotrophomonas	Xanthomonadaceae	Lysobacter, Stenotrophomonas
EstDZ2	2016	metagenome
Est22	2017	isolate	Alteromonadaceae	Alteromonas	Alteromonadaceae	Aestuariibacter, Aestuariibacter_A, Aliiglaciecola, Alteromonas, Glaciecola, Lacimicrobium, Paraglaciecola, Salinimonas
LipJ2	2017	isolate	Dermatophilaceae	Janibacter	Dermatophilaceae	Janibacter
LipSm	2018	isolate	Xanthomonadaceae	Stenotrophomonas	Xanthomonadaceae	Stenotrophomonas
AcXE2	2017	isolate	Caldicellulosiruptoraceae	Caldicellulosiruptor	Anoxybacillaceae, Caldicellulosiruptoraceae, Chthonomonadaceae, Paenibacillaceae	Caldicellulosiruptor, Chthonomonas, Geobacillus, Gorillibacterium, Paenibacillus, Paenibacillus_I, Parageobacillus
Est12	2013	isolate	Moraxellaceae	Psychrobacter	Moraxellaceae	Psychrobacter
Est9x	2014	metagenome	Alteromonadaceae	Glaciecola	Alteromonadaceae	Glaciecola
EstGX1	2012	metagenome
MplaG	2012	metagenome			Halomonadaceae, Nitrincolaceae	Motiliproteus, Oceanospirillum
RlipE1	2009	metagenome
Rv0045c	2011	isolate	Corynebacteriaceae	Mycobacterium	Corynebacteriaceae	Mycobacterium
FnL	2010	isolate	Fervidobacteriaceae	Fervidobacterium	Fervidobacteriaceae	Fervidobacterium
LipA	2010	metagenome
EstP2K	2013	metagenome
