# Supplementary material for: A proposed update for the classification and description of bacterial lipolytic enzymes
Source: PeerJ. 2019 Jul 8;7:e7249. doi: 10.7717/peerj.7249 (PMC6622161; doi:10.7717/peerj.7249)
Supplement: Table S4 — For each protein the top 10 sequence matches reported against the NR database are reported, including the source organism for each matching sequence. [file peerj-07-7249-s004.xlsx]

## Sheet: Supplementary Table 4
Supplementary Table 4: BLAST based assignment of taxonomy for lipolytic enzymes without a genome match. For each protein the top 10 sequence matches reported against the NR database are reported, including the source organism for each matching sequence.
Query lipase	Matching sequence	NCBI source organism	Percentage identity	Alignment length	Mismatches	Gap opens	Query start	Query end	Matching sequence start	Matching sequence end	E-value	Bitscore	Percentage positives
EstA	ABY60416.1	uncultured bacterium	100	277	0	0	1	277	1	277	0	575	100
EstA	SMH45354.1	Mesorhizobium australicum	69.675	277	81	2	1	275	1	276	6.73e-140	404	80.51
EstA	WP_085465046.1	Mesorhizobium australicum	69.675	277	81	2	1	275	5	280	7.35e-140	404	80.51
EstA	WP_109704737.1	Falsochrobactrum sp. HN4	67.384	279	88	2	1	277	1	278	3.03e-137	397	79.57
EstA	WP_111573881.1	Falsochrobactrum ovis	66.426	277	90	2	1	275	1	276	4.46e-137	397	80.51
EstA	WP_119044164.1	Ochrobactrum haematophilum	66.308	279	91	2	1	277	1	278	3.93e-136	394	79.21
EstA	OJY06757.1	Rhizobiales bacterium 63-22 (bioreactor metagenome)	67.148	277	88	2	1	275	1	276	4.2e-136	394	80.14
EstA	WP_095781846.1	Mesorhizobium sp. WSM3862	67.87	277	86	2	1	275	1	276	8.82e-136	393	79.78
EstA	WP_095826986.1	Mesorhizobium sp. WSM3879	67.509	277	87	2	1	275	1	276	1.82e-135	392	79.78
EstA	WP_008935197.1	Brucella	66.308	279	91	2	1	277	1	278	3.08e-135	392	79.21
EM3L4	ADH59407.1	uncultured bacterium	100	330	0	0	1	330	1	330	0	668	100
EM3L4	OGT27829.1	Gammaproteobacteria bacterium RBG_16_66_13 (subsurface metagenome)	40.123	324	187	5	4	324	48	367	3.8e-77	250	59.57
EM3L4	PKN98686.1	Chloroflexi bacterium HGW-Chloroflexi-4 (groundwater metagenome)	44.643	280	138	6	53	327	49	316	5.69e-74	240	62.5
EM3L4	RLD01138.1	Chloroflexi bacterium (marine sediment metagenome)	42.5	280	146	4	54	328	38	307	6.95e-74	239	60.71
EM3L4	OGO11912.1	Chloroflexi bacterium RBG_13_68_17 (sediment metagenome)	42.949	312	155	5	33	330	30	332	8.05e-73	238	56.73
EM3L4	RLD05139.1	Chloroflexi bacterium (marine sediment metagenome)	41.935	279	147	4	56	329	38	306	2.69e-71	233	59.5
EM3L4	PJF29216.1	Candidatus Thermofonsia Clade 2 bacterium (hot springs metagenome)	43.706	286	137	6	50	326	46	316	4.26e-71	233	59.44
EM3L4	PKN96414.1	Chloroflexi bacterium HGW-Chloroflexi-5 (groundwater metagenome)	38.298	329	156	8	8	326	17	308	1.82e-67	223	54.1
EM3L4	PYO27541.1	Gemmatimonadetes bacterium (soil metagenome)	42.446	278	148	4	53	327	38	306	4.75e-66	219	56.47
EM3L4	OGO16435.1	Chloroflexi bacterium RBG_13_68_17 (sediment metagenome)	42.857	329	181	5	4	327	2	328	7.96e-65	217	57.14
FLS18D	ACL67852.1	uncultured bacterium FLS18	100	296	0	0	1	296	1	296	0	614	100
FLS18D	OUV10461.1	Verrucomicrobiaceae bacterium TMED86 (marine metagenome)	51.071	280	124	4	19	296	27	295	2.85e-88	276	68.21
FLS18D	OUT81294.1	Roseibacillus sp. TMED18 (marine metagenome)	50.746	268	120	3	13	280	5	260	3.44e-88	275	66.79
FLS18D	OUU88393.1	Proteobacteria bacterium TMED72 (marine metagenome)	50.373	268	121	3	13	280	5	260	3.53e-87	273	66.42
FLS18D	OUU88355.1	Verrucomicrobiaceae bacterium TMED76 (marine metagenome)	53.659	246	108	2	41	281	26	270	8.77e-87	272	70.33
FLS18D	WP_007280769.1	Lentisphaera araneosa	49.807	259	122	2	30	287	30	281	5.12e-86	268	66.02
FLS18D	OUT60449.1	Rhodopirellula sp. TMED11 (marine metagenome)	52.263	243	99	4	41	282	55	281	8.08e-85	266	72.02
FLS18D	WP_019111314.1	Verrucomicrobia bacterium SCGC AAA164-L15	54.393	239	102	2	42	280	46	277	1.89e-82	261	69.46
FLS18D	WP_084732240.1	Verrucomicrobia bacterium SCGC AAA168-F10	53.138	239	105	2	42	280	46	277	6.24e-81	258	67.78
FLS18D	OUU14110.1	Cellvibrionales bacterium TMED47 (marine metagenome)	49.791	239	108	2	42	277	44	273	2.78e-76	243	66.11
FLS18C	ACL67851.1	uncultured bacterium FLS18	100	259	0	0	1	259	1	259	0	533	100
FLS18C	PCH63070.1	SAR86 cluster bacterium (marine metagenome)	62.205	254	91	4	1	252	40	290	9.88e-110	327	77.95
FLS18C	PDH34852.1	OM182 bacterium MED-G28 (marine metagenome)	58.431	255	101	3	1	252	9	261	2.16e-104	313	75.29
FLS18C	PCI78562.1	SAR86 cluster bacterium (marine metagenome)	59.922	257	94	5	1	252	9	261	2.08e-99	300	74.32
FLS18C	KRP30060.1	OM182 bacterium BACL3 MAG-120924-bin41 (marine metagenome)	54.924	264	104	7	1	255	21	278	1.29e-88	273	68.56
FLS18C	KRO81080.1	OM182 bacterium BACL3 MAG-120619-bin3 (marine metagenome)	54.924	264	104	7	1	255	21	278	1.31e-88	273	68.56
FLS18C	KRO71190.1	OM182 bacterium BACL3 MAG-120507-bin80 (marine metagenome)	54.545	264	105	7	1	255	21	278	4.87e-88	271	68.18
FLS18C	PYR49321.1	Acidobacteria bacterium (soil metagenome)	53.409	264	87	4	29	257	18	280	3.62e-87	270	65.53
FLS18C	PYR39343.1	Acidobacteria bacterium (soil metagenome)	53.409	264	87	4	29	257	39	301	9.26e-87	269	65.53
FLS18C	WP_070116203.1	Pseudohongiella acticola	53.488	258	114	4	2	255	12	267	1.85e-84	262	69.77
LipG	ABE69172.1	uncultured bacterium pFosLip	100	300	0	0	1	300	1	300	0	622	100
LipG	GAK59442.1	Candidatus Vecturithrix granuli	50.993	302	142	3	2	299	3	302	7.93e-104	314	66.23
LipG	PIE28975.1	candidate division KSB3 bacterium (oral metagenome)	47.667	300	152	2	2	298	1	298	5.55e-88	274	65.33
LipG	PID58549.1	candidate division KSB3 bacterium (oral metagenome)	47.667	300	152	2	2	298	1	298	5.61e-88	274	65.33
LipG	WP_083453229.1	Desulfatitalea tepidiphila	46.488	299	158	1	1	299	55	351	3.05e-80	256	61.54
LipG	PYS97139.1	Acidobacteria bacterium (soil metagenome)	45.806	310	150	8	3	296	5	312	1.84e-72	235	60
LipG	WP_100277696.1	Mariprofundus aestuarium	38.816	304	160	7	8	297	12	303	1.44e-60	204	54.28
LipG	PYS83407.1	Acidobacteria bacterium (soil metagenome)	39.706	340	152	8	9	296	24	362	2.59e-60	205	53.24
LipG	PYS76597.1	Acidobacteria bacterium (soil metagenome)	39.706	340	152	8	9	296	24	362	2.73e-60	205	53.24
LipG	WP_051945529.1	Verrucomicrobium sp. BvORR106	37.224	317	167	6	2	298	35	339	1.47e-57	197	53.63
EstD2	ADN26553.1	uncultured bacterium	100	397	0	0	1	397	1	397	0	821	100
EstD2	BAP40001.1	uncultured bacterium	64.356	404	130	5	1	395	16	414	0	541	78.22
EstD2	WP_116813097.1	Steroidobacter cummioxidans	67.277	382	122	3	11	391	11	390	0	539	79.32
EstD2	PYR45258.1	Acidobacteria bacterium (soil metagenome)	61.48	392	149	2	2	391	1	392	3.78e-177	508	75
EstD2	PYR32278.1	Acidobacteria bacterium (soil metagenome)	61.224	392	150	2	2	391	1	392	4.43e-176	505	74.74
EstD2	PYQ93564.1	Acidobacteria bacterium (soil metagenome)	63.944	355	127	1	34	387	16	370	8.29e-171	491	77.18
EstD2	PYR43717.1	Acidobacteria bacterium (soil metagenome)	61.878	362	137	1	37	397	43	404	1.78e-167	484	75.97
EstD2	PYR23486.1	Acidobacteria bacterium (soil metagenome)	61.719	384	139	4	11	387	10	392	3.52e-167	483	74.22
EstD2	PYR44196.1	Acidobacteria bacterium (soil metagenome)	61.719	384	139	4	11	387	10	392	5.63e-167	482	74.22
EstD2	PYR60767.1	Acidobacteria bacterium (soil metagenome)	60.925	389	136	4	7	394	2	375	1.76e-165	487	72.75
EstGH	AEM45123.1	uncultured organism	100	448	0	0	1	448	1	448	0	879	100
EstGH	WP_071947591.1	Mycobacterium sp. WY10	62.283	403	149	3	47	448	102	502	8.34e-165	483	74.69
EstGH	SBS76993.1	uncultured Mycobacterium sp.	60.89	427	160	2	22	448	114	533	7.28e-163	479	73.07
EstGH	WP_003898161.1	Mycolicibacterium smegmatis	61.209	397	153	1	52	448	95	490	8.83e-163	477	73.3
EstGH	GAY16456.1	Mycobacterium sp. shizuoka-1	65.517	377	129	1	72	448	20	395	4.38e-162	472	77.45
EstGH	WP_011731534.1	Mycolicibacterium smegmatis	60.957	397	154	1	52	448	95	490	4.89e-162	475	73.05
EstGH	WP_099249532.1	Mycobacterium sp. shizuoka-1	65.517	377	129	1	72	448	144	519	1.29e-161	475	77.45
EstGH	WP_096310001.1	Mycobacterium sp. PYR15	61.692	402	151	3	48	448	103	502	4.05e-161	473	73.88
EstGH	AFP43025.1	Mycolicibacterium smegmatis MC2 155	60.957	397	154	1	52	448	221	616	6.11e-161	477	73.05
EstGH	WP_036343343.1	Mycolicibacterium aromaticivorans	64.456	377	133	1	72	448	153	528	6.74e-159	469	76.92
EstGS	AEM45109.1	uncultured organism	100	397	0	0	1	397	1	397	0	771	100
EstGS	GBD27795.1	bacterium HR30	33.505	388	221	10	12	379	25	395	7.57e-43	164	47.42
EstGS	WP_117318309.1	Chromatocurvus halotolerans	34.677	372	208	10	33	395	33	378	4.43e-41	159	45.7
EstGS	OGO52417.1	Chloroflexi bacterium RBG_16_68_14 (subsurface metagenome)	33.333	354	221	7	43	396	44	382	6.78e-40	155	45.2
EstGS	OQY64957.1	Polyangiaceae bacterium UTPRO1 (bioreactor sludge metagenome)	35.389	373	211	11	39	397	207	563	1.54e-37	152	46.38
EstGS	PCI74692.1	SAR86 cluster bacterium (marine metagenome)	32.095	377	213	10	10	377	25	367	1.61e-36	147	46.15
EstGS	WP_052094347.1	Pseudohaliea rubra	32.603	365	205	9	40	393	38	372	1.69e-36	146	45.75
EstGS	PCJ24875.1	SAR86 cluster bacterium (marine metagenome)	31.551	374	210	11	34	393	36	377	2.22e-36	146	47.59
EstGS	OUW09284.1	Gammaproteobacteria bacterium TMED163 (marine metagenome)	35.509	383	198	18	8	378	12	357	4.83e-35	142	49.09
EstGS	WP_020377767.1	Candidatus Microthrix parvicella	38.545	275	157	5	11	281	19	285	8.46e-35	141	51.64
EstDZ2	ANI19854.1	uncultured Acetothermia bacterium	100	271	0	0	1	271	1	271	0	552	100
EstDZ2	BAL56305.1	uncultured Acetothermia bacterium	81.55	271	50	0	1	271	1	271	1.82e-163	463	88.19
EstDZ2	PHX63877.1	Planctomycetaceae bacterium (lake water metagenome)	49.219	256	121	4	21	271	29	280	4.94e-84	263	67.19
EstDZ2	KPJ55944.1	Planctomycetes bacterium DG_58 (sediment metagenome)	50.98	255	121	1	21	271	28	282	1.69e-82	258	63.92
EstDZ2	OAI48169.1	Planctomycetaceae bacterium SCGC AG-212-F19	47.843	255	128	2	15	265	20	273	3.91e-79	250	63.14
EstDZ2	BAL53813.1	uncultured planctomycete	47.86	257	128	3	19	271	57	311	6.66e-78	248	64.59
EstDZ2	WP_052556345.1	Gemmata sp. SH-PL17	42.264	265	151	1	7	269	17	281	1.77e-69	225	58.11
EstDZ2	WP_010051291.1	Gemmata obscuriglobus	40.84	262	155	0	8	269	23	284	2.07e-69	225	59.54
EstDZ2	WP_020473051.1	Zavarzinella formosa	40.441	272	157	3	4	271	25	295	4.12e-69	224	62.5
EstDZ2	PYM11168.1	Verrucomicrobia bacterium (soil metagenome)	44.615	260	141	2	12	271	389	645	6.58e-64	221	62.69
LipA	ACJ13070.1	uncultured bacterium	100	277	0	0	1	277	1	277	0	571	100
LipA	OPX36871.1	Desulfobacteraceae bacterium 4484_190.2 (marine sediment metagenome)	58.484	277	115	0	1	277	1	277	1.81e-119	352	74.73
LipA	ADH59409.1	uncultured bacterium	58.845	277	114	0	1	277	1	277	9.35e-109	325	74.37
LipA	OVE73459.1	bacterium B13(2017)	41.667	264	128	7	2	248	5	259	1.21e-63	211	60.98
LipA	KPK30095.1	Nitrospira bacterium SG8_3 (sediment metagenome)	41.667	276	147	6	2	276	4	266	4.23e-62	206	60.87
LipA	RLB39677.1	Deltaproteobacteria bacterium (marine sediment metagenome)	43.478	276	141	6	3	276	5	267	4.66e-62	206	58.7
LipA	RJR26576.1	Desulfobacteraceae bacterium (subsurface metagenome)	42.391	276	146	5	2	276	4	267	2.77e-60	201	58.7
LipA	PYS91157.1	Acidobacteria bacterium (soil metagenome)	41.812	287	143	7	2	272	6	284	2.9e-60	202	58.19
LipA	OLE52290.1	Acidobacteria bacterium 13_1_20CM_3_53_8 (soil metagenome)	40.767	287	146	6	2	272	3	281	2.6e-58	197	56.79
LipA	OIP43937.1	Desulfobacteraceae bacterium CG2_30_51_40 (groundwater metagenome)	41.877	277	146	6	2	276	4	267	1.61e-57	194	57.04
RlipE1	ACM91047.1	uncultured bacterium URE4	100	361	0	0	1	361	1	361	0	746	100
RlipE1	WP_082063450.1	Draconibacterium sediminis	48.128	374	172	4	8	361	19	390	1.33e-120	362	64.17
RlipE1	KJF45148.1	Draconibacterium sediminis	48.128	374	172	4	8	361	2	373	1.85e-120	362	64.17
RlipE1	WP_026475222.1	Alkaliflexus imshenetskii	46.757	370	173	3	15	361	5	373	5.27e-120	360	62.97
RlipE1	WP_079555980.1	Alkalitalea saponilacus	46.703	364	181	2	10	361	25	387	1.36e-118	357	64.84
RlipE1	SKB32487.1	Alkalitalea saponilacus	46.703	364	181	2	10	361	49	411	1.37e-118	358	64.84
RlipE1	AHW58804.1	Draconibacterium orientale	46.736	383	176	5	5	361	10	390	1.23e-117	355	62.66
RlipE1	WP_081804932.1	Draconibacterium orientale	49.28	347	159	3	30	361	29	373	2.02e-117	354	66.28
RlipE1	WP_106658188.1	Confluentibacter sp. 3B	49.307	361	160	4	21	361	22	379	2.75e-117	354	64.27
RlipE1	WP_068704542.1	Paludibacter jiangxiensis	46.011	376	180	3	8	361	13	387	2.51e-116	352	62.77
MplaG	ABY56067.1	uncultured bacterium pFosPlaG	100	565	0	0	1	565	1	565	0	1150	100
MplaG	WP_081414400.1	Balneatrix alpica	58.781	279	115	0	287	565	26	304	4.94e-106	330	78.85
MplaG	WP_051227336.1	Oceanospirillum beijerinckii	60.215	279	110	1	287	565	9	286	6.38e-105	326	77.06
MplaG	WP_076714148.1	Motiliproteus sp. MSK22-1	61.837	283	104	1	283	565	6	284	1.98e-103	322	75.27
MplaG	RLC13083.1	Deltaproteobacteria bacterium (marine sediment metagenome)	58.966	290	116	2	1	287	1	290	3.6e-100	330	72.76
MplaG	EDN68055.1	Beggiatoa sp. PS	54.355	287	118	6	11	287	2	285	3.55e-89	295	69.69
MplaG	EDN68055.1	Beggiatoa sp. PS	46.914	162	71	5	137	292	8	160	2.88e-28	130	61.11
MplaG	PKB71592.1	SAR202 cluster bacterium Io17-Chloro-G6 (marine metagenome)	36.33	267	156	6	29	287	33	293	8.57e-33	145	52.81
MplaG	PKB71592.1	SAR202 cluster bacterium Io17-Chloro-G6 (marine metagenome)	28.505	214	138	6	163	369	36	241	1.45e-11	79.3	46.26
MplaG	PKB71592.1	SAR202 cluster bacterium Io17-Chloro-G6 (marine metagenome)	37.956	137	75	4	25	155	160	292	1.09e-10	76.3	51.82
MplaG	WP_094059638.1	Bacterioplanes sanyensis	33.566	286	138	12	291	565	26	270	1.09e-25	117	50.35
MplaG	PCJ74918.1	Dehalococcoidia bacterium (marine metagenome)	39.506	162	90	3	139	296	1	158	1.4e-24	112	54.94
MplaG	PCJ74918.1	Dehalococcoidia bacterium (marine metagenome)	37.795	127	73	2	33	155	24	148	7.98e-14	81.3	54.33
MplaG	WP_092207557.1	Desulfoluna spongiiphila	34.091	308	147	16	288	565	35	316	3.35e-21	105	46.1
estGX1	ADZ54162.1	uncultured bacterium	100	210	0	0	1	210	1	210	2.46e-146	414	100
estGX1	WP_112257204.1	Phytoactinopolyspora sp. YIM 96934	46.341	164	80	2	53	208	10	173	1.16e-39	143	65.24
estGX1	OYV61387.1	Actinobacteria bacterium 21-73-9 (mine drainage metagenome)	51.351	148	71	1	62	208	11	158	4.81e-38	138	70.27
estGX1	WP_010230287.1	Pseudonocardia	51.678	149	67	2	62	205	6	154	8.79e-37	135	69.13
estGX1	ALL76250.1	Pseudonocardia sp. EC080610-09	51.678	149	67	2	62	205	12	160	1.1e-36	135	69.13
estGX1	WP_051736609.1	Pseudonocardia autotrophica	50.331	151	73	2	56	205	9	158	1.66e-36	134	68.21
estGX1	WP_052604404.1	Acidithrix ferrooxidans	48.701	154	78	1	57	209	11	164	1.88e-36	135	65.58
estGX1	GAY12730.1	Pseudonocardia sp. N23	51.748	143	68	1	64	205	2	144	8.24e-36	132	71.33
estGX1	WP_093088524.1	Pseudonocardia oroxyli	50	148	73	1	59	205	15	162	5.99e-35	130	66.89
estGX1	WP_098961254.1	Pseudonocardia sp. N23	52.899	138	64	1	69	205	1	138	1.44e-34	129	71.01
EstP2K	AEH57833.1	uncultured microorganism	100	224	0	0	1	224	1	224	9.96e-165	462	100
EstP2K	WP_092991953.1	Thiohalomonas denitrificans	57.073	205	87	1	1	205	1	204	2.26e-77	241	71.71
EstP2K	OGT35414.1	Gammaproteobacteria bacterium RBG_16_51_14 (subsurface metagenome)	49.261	203	102	1	4	205	9	211	4.5e-58	192	63.05
EstP2K	OGT82289.1	Gammaproteobacteria bacterium RIFCSPLOWO2_02_FULL_52_10	50.99	202	98	1	5	205	6	207	1.26e-57	190	68.32
EstP2K	RJQ49102.1	Gammaproteobacteria bacterium (subsurface metagenome)	50.746	201	99	0	4	204	11	211	2.04e-55	185	64.18
EstP2K	PIE45462.1	Gammaproteobacteria bacterium (oral metagenome)	47.826	207	106	1	1	205	1	207	2.13e-55	185	61.35
EstP2K	PXF55671.1	Deltaproteobacteria bacterium (marine sediment metagenome)	43.204	206	116	1	2	206	18	223	1.6e-54	183	63.11
EstP2K	KPK40148.1	Gammaproteobacteria bacterium SG8_47 (sediment metagenome)	47.805	205	106	1	1	204	1	205	6.54e-54	181	60
EstP2K	OGT83118.1	Gammaproteobacteria bacterium RIFCSPLOWO2_02_FULL_61_13	47.03	202	106	1	5	205	6	207	1.47e-53	180	58.42
EstP2K	OGT65479.1	Gammaproteobacteria bacterium RIFCSPLOWO2_01_FULL_47_190	46.316	190	101	1	17	205	2	191	2.55e-53	179	63.16
